# Supplementary material for: An electron-poor di-molybdenum triple-decker with a puckered [B4Ru2] bridging ring is an oblato-closo cluster
Source: Royal Society of Chemistry journal article supplement (doi:10.1039/c4cc09630d), 2015-01-01
Supplement: c4cc09630d1.pdf [file c4cc09630d1.pdf]

## Supporting information

### **An Electron-poor Di-Molybdenum Triple-decker with a puckered [B<sub>4</sub>Ru<sub>2</sub>] bridging ring is an *oblato-closo* Cluster†**

*Bijan Mondal, Bijnaneswar Mondal, Koushik Pal, Babu Varghese and Sundargopal Ghosh\**

Department of Chemistry, Indian Institute of Technology Madras, Chennai 600 036, India. Email: [sgghosh@iitm.ac.in](mailto:sgghosh@iitm.ac.in)

Sophisticated Analytical Instruments Facility, Indian Institute of Technology Madras, Chennai 600 036, India

## Experimental Details

- I.1 Experimental Section
- I.2 Synthetic Section
- I.3 Crystal structure determination
- I.4 Computational Method

### I. Supplementary Data

- II.1 Table S1 Selected bond parameters for the compounds **2'-4'** optimized at the BP86/def2-TZVP Level
- II.2 Table S2 DFT calculated and experimental <sup>11</sup>B chemical shifts  $\delta$  (ppm) and IR (cm<sup>-1</sup>, uncorrected) stretching values for **2'-4'** at BP86/def2-TZVP
- II.3 Table S3 DFT calculated energies of the HOMO and LUMO (eV), HOMO-LUMO gaps ( $\Delta E = E_{\text{LUMO}} - E_{\text{HOMO}}$ , eV) for the compounds **2'-4'** and **[(Cp\*Mo)<sub>2</sub>B<sub>4</sub>H<sub>8</sub>]**
- II.4 Fig. S1 Molecular structure of **2**
- II.5 Fig. S2 Molecular structure of **3**
- II.6 Fig. S3 Molecular structure of **4**
- II.7 Fig. S4 Schematic representation of atomic deviations from the mean plane of [Ru<sub>2</sub>B<sub>4</sub>] in **2**.
- II.8 Fig. S5 Molecular structure of **5**
- II.9 Fig. S6 Comparison of the MO diagram of **2** with [Cp<sub>3</sub>Ni<sub>2</sub>]<sup>+</sup>, [(CpMo)<sub>2</sub>P<sub>6</sub>], [(CpRe)<sub>2</sub>B<sub>6</sub>H<sub>6</sub>] and [(CpTi)<sub>2</sub>P<sub>6</sub>]
- II.10 Fig. S7 Optimized geometry of **2'** Complex
- II.11 Fig. S8 Optimized geometry of **3'**
- II.12 Fig. S9 Optimized geometry of **4'**
- II.13 Fig. S10 Optimized geometry of **[(Cp\*Mo)<sub>2</sub>B<sub>4</sub>H<sub>8</sub>]**

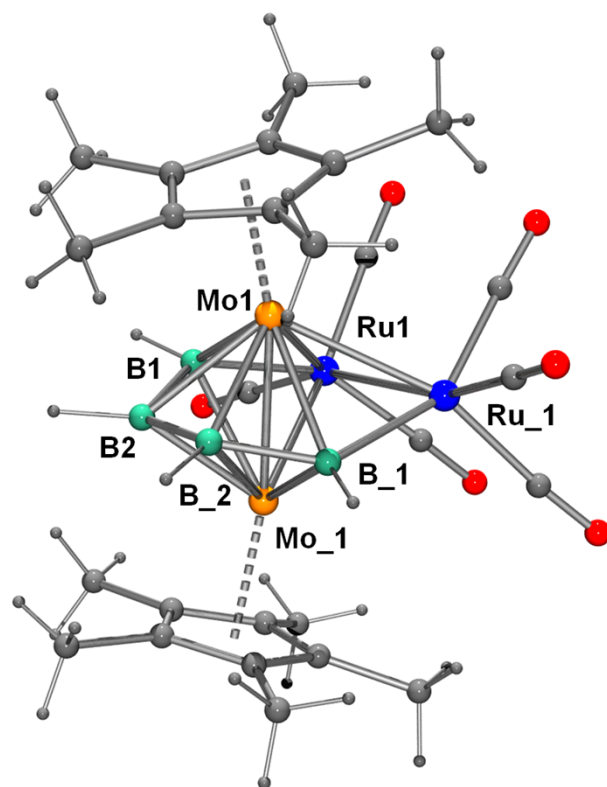

**Fig. S1** Molecular structure of **2**. Selected bond lengths (Å) and angles (deg): Mo1-Mo<sub>1</sub> 2.7510(5), Mo1-Ru1 2.6625(4), Mo<sub>1</sub>-Ru1 2.9529(4), Mo1-B1 2.261(4), Mo1-B2 2.276(4), Mo1-B1 2.261(4), Mo1-B2 2.133(5), Mo<sub>1</sub>-B2 2.133(5), Ru1-Ru<sub>1</sub> 2.8822(5), B1-B2 1.622(5), B2-B<sub>2</sub> 1.679(7), B1-Ru1 2.180(4), B1-H1 1.080(19), B2-H2 1.224(19), B1-B2-B<sub>1</sub> 118.5(2), B2-B<sub>1</sub>-Ru1 136.9(3), B1-Ru1-Ru<sub>1</sub> 93.73(10), B2-B1-Mo1 75.5(2), Mo1-B1-Ru1 88.41(15), B2-B1-Mo1 64.2(2), Mo1-B1-Mo<sub>1</sub> 79.08(13), Ru1-B1-Mo1 73.66(12), B1-B2-Mo1 60.9(2), Mo1-B2-Mo1 77.15(15), B1-Mo1-B2 85.32(16), B1-Mo1-B1 100.48(13), B1-Mo1-Ru1 103.59(11), B2-Mo1-Ru1 94.58(11), B1-Mo1-Mo<sub>1</sub> 53.79(11), B2-Mo1-Mo<sub>1</sub> 53.75(12).

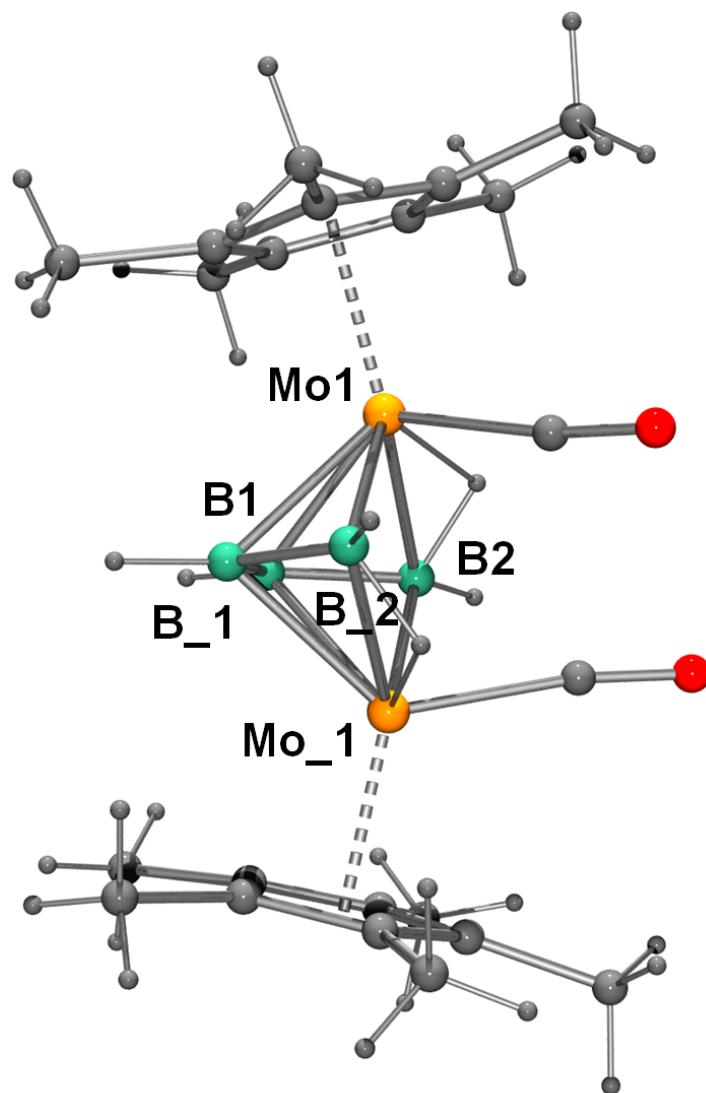

**Fig. S2** Molecular structure of **3**. Selected bond lengths (Å) and angles (deg): B1-B2 1.63(3), B1-B\_1 1.73(6), Mo1-Mo\_1 2.9262(11), Mo1-B1 2.195(13), B\_1-Mo1 2.211(14), Mo1-B2 2.222(14), B\_2-Mo1 2.260(11), Mo1-B1 2.195(13), B1-H1 1.13(2), B2-H2 1.150(11), B2-H2A 1.156(11), B2-B1-B\_1 120.6(10), B2-B1-Mo1 70.7(7), B1-B\_1-Mo1 67.3(8), B2-B1-Mo1 68.8(7), B1-B\_1-Mo1 66.4(11), Mo1-B1-Mo\_1 83.2(5), B1-B2-Mo1 68.0(9), B1-B2-Mo1 66.4(7), Mo1-B2-Mo\_1 81.5(4), B1-Mo1-B\_1 46.3(15), B1 Mo1 B\_2 82.8(10), B1-Mo1-B2 43.2(8), B1-Mo\_1-B2 42.9(8), B1-Mo1-B2 81.6(9), B2-Mo\_1-B2 98.5(4), B1-Mo1-Mo\_1 48.6(4), B1-Mo\_1-Mo1 48.1(3), B2-Mo1-Mo\_1 49.8(3), B2-Mo\_1-Mo1 48.7(3).

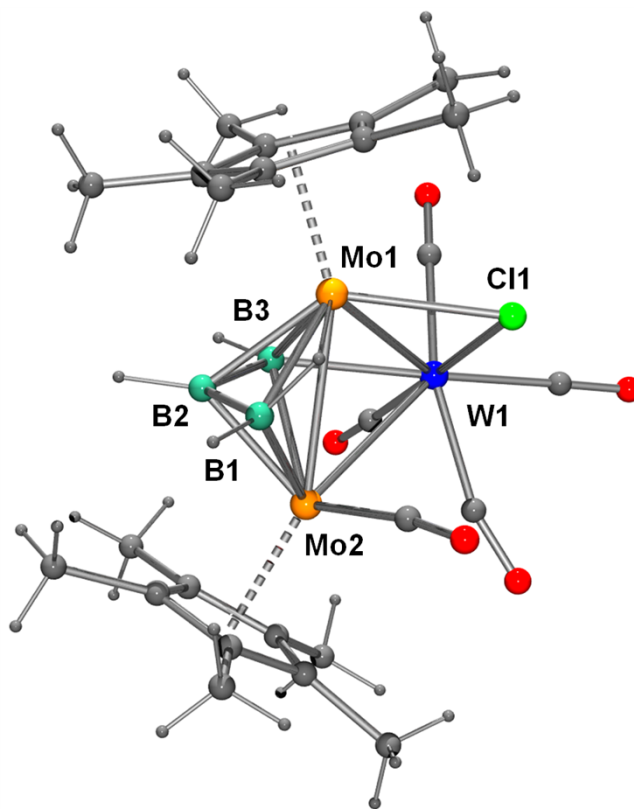

**Fig. S3** Molecular structure of **4**. Selected bond lengths (Å) and angles (deg): Mo1-Mo2 2.9611(7), B1-B2 1.719(12), B2-B3 1.736(10), B3-W1 2.340(7), Mo1-B1 2.247(8), Mo1-B2 2.134(7), Mo1-B3 2.333(7), Mo2-B1 2.189(8), Mo2-B2 2.185(7), Mo2-B3 2.172(7), Mo1-W1 3.0004(6), Mo2-W1 2.9433(6), Mo2-C11 2.4246(15), W1-C11 2.5203(16), B3-H3 1.15(2), B1-H1D 1.13(2), B1-H1E 1.15(2), Mo2-H1E 1.77(7), B2-H2 1.15(2), B1-B2-B3 121.2(6), B2-B3-W1 131.8(5), Mo2-C11-W1 73.03(4), B2-B1-Mo2 66.7(4), B2-B1-Mo1 63.5(4), Mo2-B1-Mo1 83.7(3), B1-B2-Mo1 70.4(4), B3-B2-Mo1 73.4(4), B1-B2-Mo2 67.0(4), B3-B2-Mo2 66.1(3), Mo1-B2-Mo2 86.6(3), B2-B3-Mo2 66.9(3), B2-B3-Mo1 61.2(3), Mo2-B3-Mo1 82.1(2), Mo2-B3-W1 81.3(2), Mo1-B3-W1 79.9(2), C11-W1-Mo1 86.44(4), Mo2-W1-Mo1 59.752(14)

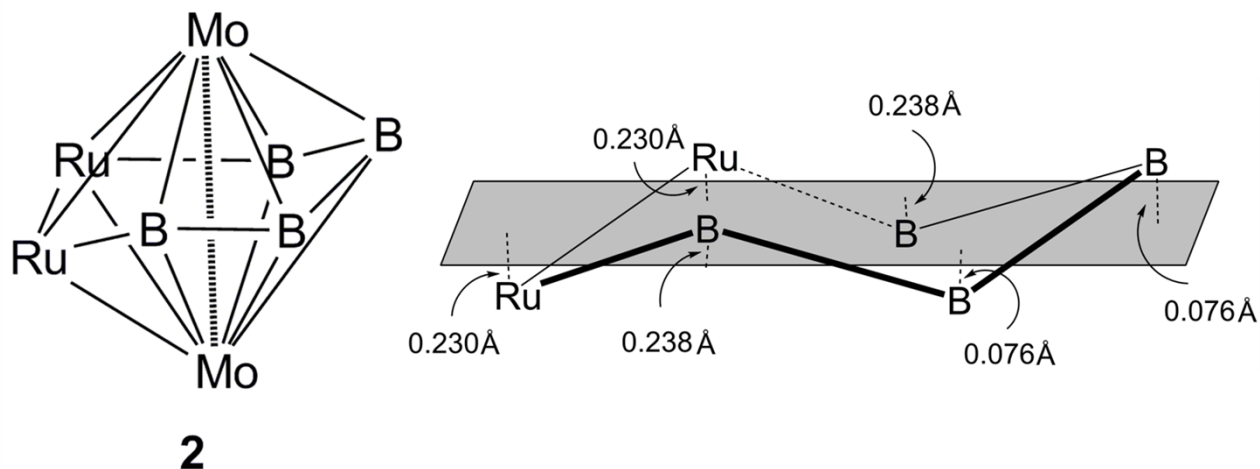

**Fig. S4** Schematic representation of atomic deviations from the mean plane of  $[\text{Ru}_2\text{B}_4]$  in **2**.

### ***I.1 Experimental Section***

#### **General Considerations:**

All the manipulations were conducted under an Ar atmosphere using standard Schlenk techniques. Solvent were distilled prior to use under Argon atmosphere.  $[\text{Cp}^*\text{MoCl}_4]$ ,  $[\text{Mo}(\text{CO})_5]\cdot\text{thf}$  and  $[\text{W}(\text{CO})_5]\cdot\text{thf}$  were prepared according to literature methods,<sup>1</sup> while other chemicals such as,  $[\text{LiBH}_4]$  2.0 M in THF,  $\text{Cp}^*\text{H}$ ,  $n\text{-BuLi}$ ,  $[\text{Mo}(\text{CO})_6]$ ,  $[\text{W}(\text{CO})_6]$  and  $[\text{Ru}_3(\text{CO})_{12}]$  were obtained commercially (Aldrich) and used as received. MeI was purchased from Aldrich and freshly distilled prior to use. The external reference for the  $^{11}\text{B}$  NMR,  $[\text{Bu}_4\text{N}(\text{B}_3\text{H}_8)]$  was synthesized with the literature method.<sup>2</sup> Preparative thin layer chromatography (TLC) was carried on 250 mm dia aluminum supported silica gel TLC plates (MERCK TLC Plates). NMR spectra were recorded on 400 and 500 MHz Bruker FT-NMR spectrometer. The residual solvent protons were used as reference ( $\delta$ , ppm,  $\text{CDCl}_3$ , 7.26), while a sealed tube containing  $[\text{Bu}_4\text{N}(\text{B}_3\text{H}_8)]$  in  $[\text{D}_6]$ benzene ( $\delta_{\text{B}}$ , ppm, -30.07) was used as an external reference for the  $^{11}\text{B}$  NMR. Infrared spectra were recorded on a Nicolet iS10 spectrometer. The photo-reactions described in this report were conducted in a Luzchem LZC-4 V photo reactor, with irradiation at 254–350 nm. MALDI-

TOF mass spectra were recorded on a Bruker Ultraflex extreme by using 2,5-dihydroxybenzoic acid as a matrix and a groundsteel target plate and CH analyses were obtained on Perkin Elmer Instruments series II model 2400.

## ***1.2 Synthetic Section***

### **Preparation of [(Cp\*Mo)<sub>2</sub>{μ-η<sup>6</sup>:η<sup>6</sup>-B<sub>4</sub>H<sub>4</sub>Ru<sub>2</sub>(CO)<sub>6</sub>}] (2):**

In a flame-dried Schlenk tube [Cp\*MoCl<sub>4</sub>] (0.1 g, 0.27 mmol) in 10 mL of toluene was treated with 5-fold excess of [LiBH<sub>4</sub>.thf] (0.7 mL, 1.4 mmol) at -40 °C and allowed to stir at room temperature for one hour. After removal of toluene, the residue was extracted into hexane and filtered through a frit using Celite. The brownish-green hexane extract was dried and taken in 10 mL of toluene and heated at 90 °C for 72 hours with [Ru<sub>3</sub>(CO)<sub>12</sub>] (0.18 g, 0.28 mmol). The volatile components were removed under vacuum and the remaining residue was extracted into hexane and passed through celite. After removal of solvent, the residue was subjected to chromatographic work up using silica gel TLC plates. Elution with a hexane/CH<sub>2</sub>Cl<sub>2</sub> (90:10 v/v) mixture yielded brown **2** (0.01 g, 4%).

**2:** MS(MALDI): m/z 908 [M+Na]<sup>+</sup>. isotope envelope C<sub>26</sub>H<sub>34</sub>B<sub>4</sub>O<sub>6</sub>Mo<sub>2</sub>Ru<sub>2</sub>Na requires 908. <sup>11</sup>B NMR (22 °C, 128 MHz, [D<sub>6</sub>]-benzene): δ = 91.3 (br, 2B). <sup>1</sup>H NMR (22 °C, 400 MHz, [D<sub>6</sub>]-benzene): δ = 7.81 (B-H<sub>t</sub>), 1.91 (s, 30H, 2Cp\*), <sup>13</sup>C NMR (22 °C, 100 MHz, [D<sub>6</sub>]-benzene): δ = 188.3, 183 (CO), 97.0 (C<sub>5</sub>Me<sub>5</sub>), 14.1 (C<sub>5</sub>Me<sub>5</sub>). IR ν<sub>bar</sub>/cm<sup>-1</sup>: 2403 (B-H<sub>t</sub>), 1799, 1743 (CO).

### **Preparation of [(Cp\*MoCO)<sub>2</sub>B<sub>4</sub>H<sub>6</sub>] (3):**

In a flame-dried Schlenk tube [Cp\*MoCl<sub>4</sub>] (0.1 g, 0.27 mmol) in 10 mL of toluene was treated with 5-fold excess of [LiBH<sub>4</sub>.thf] (0.7 mL, 1.4 mmol) at -40 °C and allowed to stir at room temperature for one hour. After removal of toluene, the residue was extracted into hexane and filtered through a frit using Celite. The brownish-green hexane extract was dried and taken in 10 mL of thf. The resulting solution was heated at 65 °C with previously made [Mo(CO)<sub>5</sub>].thf for 24 hours. The solvent was evaporated in vacuo and residue was extracted into hexane and passed through Celite. After removal of solvent from the filtrate, the residue was subjected to chromatographic workup using silica gel TLC plates. Elution with a hexane/CH<sub>2</sub>Cl<sub>2</sub> (80:20 v/v) mixture yielded **3** (0.06 g, 40%).

**3:** MS(MALDI):  $m/z$  572  $[M]^+$ . isotope envelope  $C_{22}H_{36}B_4O_2Mo_2$  requires 572.  $^{11}B$  NMR (22 °C, 128 MHz,  $[D_6]$ -benzene):  $\delta = 15.8$  (br, 2B), 63.7 (br, 2B).  $^1H$  NMR (22 °C, 400 MHz,  $[D_6]$ -benzene):  $\delta = 4.56$  (br, 4H,  $BH_t$ ), 1.94 (s, 30H, 2Cp\*), -9.81 (br, 2H, Mo–H–B).  $^{13}C$  NMR (22 °C, 100 MHz,  $[D_6]$ -benzene):  $\delta = 185$  (CO), 102.3 ( $C_5Me_5$ ), 10.3 ( $C_5Me_5$ ). IR (hexane)  $\nu/cm^{-1}$ : 2417w ( $BH_t$ ), 1912 (CO). Elemental analysis (%) calcd for  $^{12}C_{22}^{1}H_{36}^{11}B_4^{16}O_2^{96}Mo_2$ : C, 46.54; H, 6.39. Found: C, 46.28; H, 6.12.

**Preparation of [(Cp\*MoCO)(Cp\*MoCl)( $\mu$ -H)B<sub>3</sub>H<sub>3</sub>W(CO)<sub>4</sub>] (4):**

In a flame-dried Schlenk tube  $[Cp^*MoCl_4]$ , (0.1 g, 0.27 mmol) in 10 mL of toluene was treated with 5-fold excess of  $[LiBH_4.thf]$  (0.7 mL, 1.4 mmol) at -40°C and allowed to stir at room temperature for one hour. After removal of toluene, the residue was extracted into hexane and filtered through a frit using Celite. The brownish-green hexane extract was dried in vacuo, extracted with 10 mL of thf and heated at 65°C with  $[W(CO)_5]$  thf for 24 hours. The solvent was evaporated in vacuo and residue was extracted into hexane and passed through Celite. After removal of solvent from the filtrate, the residue was subjected to chromatographic workup using silica gel TLC plates. Elution with a hexane/ $CH_2Cl_2$  (80:20 v/v) mixture yielded **4** (0.025 g, 10%) along with **3** (0.01 g, 6%)

**4:** MS(MALDI):  $m/z$  806  $[M-2CO]^+$ . isotope envelope  $C_{23}H_{34}B_3O_3Cl_1Mo_2W_1$  requires 806.  $^{11}B$  NMR (22 °C, 128 MHz,  $[D_6]$ -benzene):  $\delta = 75.4$  (br, 1B), 99.2 (br, 1B), 106.6 (br, 1B).  $^1H$  NMR (22 °C, 400 MHz,  $[D_6]$ -benzene):  $\delta = 6.1$ , (br, 3H,  $BH_t$ ), 1.8 (s, 30H, 2Cp\*), -8.04 (br, 1H, Mo–H–B).  $^{13}C$  NMR (22 °C, 100 MHz,  $[D_6]$ -benzene):  $\delta = 193$ , 183 (CO), 103.5 ( $C_5Me_5$ ), 10.2 ( $C_5Me_5$ ). IR (hexane)  $\nu/cm^{-1}$ : 2403w ( $BH_t$ ), 2002, 1894, 1836 (CO). Elemental analysis (%) calcd for  $^{12}C_{25}^{1}H_{34}^{11}B_3^{16}O_3^{35.5}Cl_1^{96}Mo_2^{184}W_1$ : C, 34.98; H, 3.99. Found: C, 35.19; H, 3.79.

**Preparation of [(Cp\*Mo)<sub>2</sub>(CO)<sub>4</sub>( $\mu_4$ -B)Ru<sub>2</sub>(CO)<sub>6</sub>( $\mu$ -H)] (5):**

In a flame-dried Schlenk tube, a green solution of **3** (0.1 g, 0.17 mmol) and  $Ru_3(CO)_{12}$  (0.11 g, 0.17 mmol) in toluene (15 mL) was thermolysed for 72 hours at 90°C temperature. The volatile components were removed under vacuum and the remaining residue was extracted into hexane and passed through celite. After removal of solvent, the residue was subjected to chromatographic work up using silica gel TLC plates. Elution with a hexane/ $CH_2Cl_2$  (80:20 v/v) mixture yielded orange solid **5** (0.013 g, 8%).



**5**: MS(MALDI):  $m/z$  962  $[M]^+$ . isotope envelope  $C_{30}H_{31}B_1O_{10}Mo_2Ru_2$  requires 962.  $^{11}B$  NMR (22 °C, 128 MHz,  $[D_6]$ -benzene):  $\delta$  128.4 (s, 1B).  $^1H$  NMR (22 °C, 400 MHz,  $[D_6]$ -benzene):  $\delta$  2.04 (s, 30H, 2Cp\*), -18.9 (s, 1H, Ru-H-Ru).  $^{13}C$  NMR (22 °C, 100 MHz,  $[D_6]$ -benzene):  $\delta$  196.1, 191.3 (CO), 99.7 ( $C5Me5$ ), 11.6 ( $C5Me5$ ). IR  $\nu_{bar}/cm^{-1}$ : 2046, 2017, 1976 (CO). Elemental analysis (%) calcd for  $^{12}C_{30}^{1}H_{31}^{11}B_{116}O_{10}^{96}Mo_2^{101}Ru_2$  : C, 37.67; H, 3.26. Found: C, 37.75; H, 3.20.

### 1.3 Crystal structure determination

Suitable X-ray quality crystals of **2-4** and **5** were grown by slow diffusion of a hexane:CH<sub>2</sub>Cl<sub>2</sub> solution. The crystal data for **2-4** and **5** were collected and integrated using a Bruker Axs kappa apex2 CCD diffractometer, with graphite monochromated Mo-K $\alpha$  ( $\lambda = 0.71073$  Å) radiation at 173 K. The structures were solved by heavy atom methods using SHELXS-97 or SIR92<sup>3a</sup> and refined using SHELXL-97<sup>3</sup>.

Crystal data for **2**:  $C_{26}H_{34}B_4O_6Mo_2Ru_2$ ,  $M_r = 879.79$ , Monoclinic space group  $C2/c$ ,  $a = 17.5892(4)$  Å,  $b = 15.9899(4)$  Å,  $c = 11.2183(3)$  Å,  $\beta = 102.02^\circ$ ,  $V = 3085.94$  Å<sup>3</sup>,  $Z = 4$ ,  $\rho_{calcd} = 1.894$  g•cm<sup>-3</sup>,  $\mu = 14.589$  mm<sup>-1</sup>,  $F(000) = 1720$ ,  $R_1 = 0.0317$ ,  $wR^2 = 0.0872$ , 3019 independent reflections [ $2\theta \leq 72.47^\circ$ ] and 192 parameters.

Crystal data for **3**:  $C_{22}H_{36}B_4O_2Mo_2$ ,  $M_r = 587.84$ , Tetragonal space group  $P4_32_12$ ,  $a = 9.004(3)$  Å,  $b = 9.004(3)$  Å,  $c = 31.305(10)$  Å,  $\beta = 90^\circ$ ,  $V = 2538.06$  Å<sup>3</sup>,  $Z = 3$ ,  $\rho_{calcd} = 2.826$  g•cm<sup>-3</sup>,  $\mu = 5.103$  mm<sup>-1</sup>,  $F(000) = 1978$ ,  $R_1 = 0.0371$ ,  $wR^2 = 0.0952$ , 2237 independent reflections [ $2\theta \leq 50^\circ$ ] and 145 parameters.

Crystal data for **4**:  $C_{25}H_{34}B_3O_5Cl_1Mo_2W_1$ ,  $M_r = 858.13$ , Monoclinic space group  $P2_1/n$ ,  $a = 9.005(8)$  Å,  $b = 18.588(14)$  Å,  $c = 17.767(14)$  Å,  $\beta = 99.38^\circ$ ,  $V = 2934.6$  Å<sup>3</sup>,  $Z = 4$ ,  $\rho_{calcd} = 1.942$  g•cm<sup>-3</sup>,  $\mu = 4.876$  mm<sup>-1</sup>,  $F(000) = 1656$ ,  $R_1 = 0.0347$ ,  $wR^2 = 0.0686$ , 5173 independent reflections [ $2\theta \leq 50^\circ$ ] and 350 parameters.

Crystal data for **5**:  $C_{30}H_{31}B_1O_{10}Mo_2Ru_2$ ,  $M_r = 955.37$ , Orthorhombic space group  $Pccn$ ,  $a = 17.2668(7)$  Å,  $b = 30.7845(13)$  Å,  $c = 12.5659(6)$  Å,  $\beta = 90^\circ$ ,  $V = 6679.4$  Å<sup>3</sup>,  $Z = 8$ ,  $\rho_{calcd} = 1.900$  g•cm<sup>-3</sup>,  $\mu = 1.674$  mm<sup>-1</sup>,  $F(000) = 3736$ ,  $R_1 = 0.0361$ ,  $wR^2 = 0.0816$ , 4726 independent reflections [ $2\theta \leq 46.36^\circ$ ] and 416 parameters.

Crystallographic data have been deposited with the Cambridge Crystallographic Data Center as supplementary publication no. CCDC-1036041 (2), CCDC-1036042(3), CCDC-1036043(4) and CCDC-1036888 (5). These data can be obtained free of charge from The Cambridge Crystallographic Data Centre via [www.ccdc.cam.ac.uk/data\\_request/cif](http://www.ccdc.cam.ac.uk/data_request/cif)

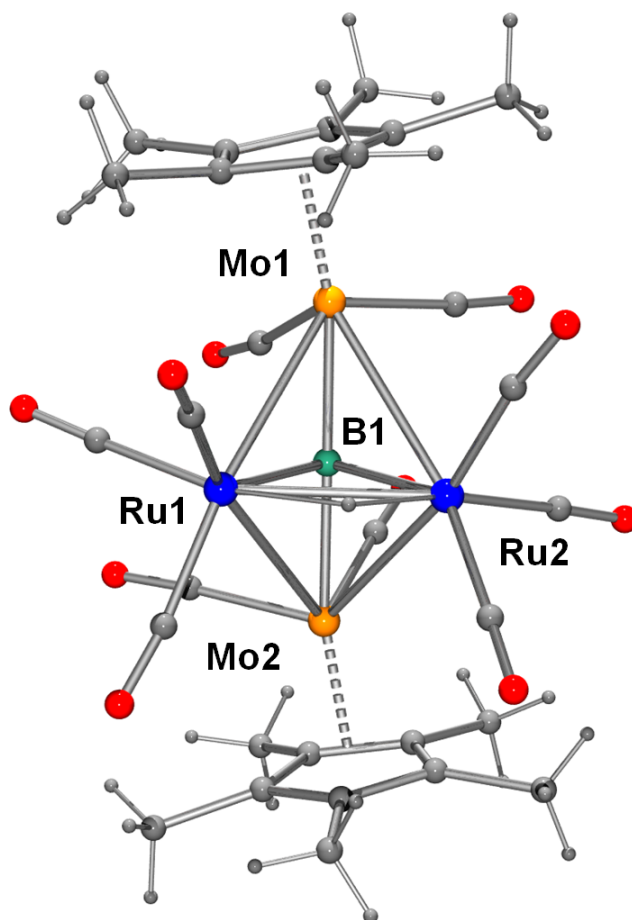

**Fig. S5** Molecular structure of (**5**). Selected bond lengths (Å) and angles (deg): B1-Mo2 2.114(7), B1-Mo1 2.131(7), B1-Ru2 2.177(7), B1-Ru1 2.191(7), Mo1-Ru1 2.9782(8), Mo1-Ru2 3.0351(8), Mo2-Ru2 2.9858(7), Mo2-Ru1 3.0377(7), Ru1-Ru2 2.8293(7), Ru1-H1 1.81(6), Ru2-H1 1.62(6), Mo2-B1-Mo1 176.4(4), Mo2-B1-Ru2 88.2(3), Mo1-B1-Ru2 89.6(3), Mo2-B1-Ru1 89.7(3), Mo1-B1-Ru1 87.1(3), Ru2-B1-Ru1 80.7(2), B1-Mo1-Ru1 47.28(19), B1-Mo1-Ru2 45.83(19), Ru1-Mo1-Ru2 56.125(17), B1-Mo2-Ru2 46.79(19), B1-Mo2-Ru1 46.15(19), Ru2-Mo2-Ru1 56.022(16), B1-Ru1-Ru2 49.42(18), B1-Ru1-Mo1 45.61(19), Ru2-Ru1-Mo1 62.954(18), B1-Ru1-Mo2 44.10(19), Ru2-Ru1-Mo2 61.060(17), Mo1-Ru1-Mo2 89.691(19), B1-Ru2-Ru1 49.84(18), B1-Ru2-Mo2 45.04(19)

#### ***1.4 Computational Method***

Geometry optimizations and electronic structure calculations were carried out on Gaussian09 (rev. C.01) program package<sup>4</sup> using BP86 functional<sup>5</sup> (composed of the Becke 1988 exchange functional and the Perdew 86 correlation functional) and def2-TZVP<sup>6</sup> basis set from EMSL Basis Set Exchange Library. The 28 core electrons of molybdenum, ruthenium and tungsten were replaced by the quasi-relativistic effective core potential def2-ECP<sup>7</sup>. To save computing time all the calculations were carried out with the Cp analogue model compounds, instead of Cp\*. The model compounds were fully optimized in gaseous state (no solvent effect) without any symmetry constraints. Vibrational analysis was carried out for all structures, and the absence of any imaginary frequency confirmed that all structures represent minima on the potential energy hypersurface. The NMR chemical shifts were calculated on the BP86/def2-TZVP optimized geometries using the gradient corrected hybrid functional hybrid Becke–Lee–Yang–Parr (B3LYP) functional.<sup>8</sup> Computation of the NMR shielding tensors employed gauge-including atomic orbitals (GIAOs)<sup>9</sup>. The <sup>11</sup>B NMR chemical shifts were calculated relative to B<sub>2</sub>H<sub>6</sub> (B3LYP B shielding constant 84.23 ppm) and converted to the usual [BF<sub>3</sub>.OEt<sub>2</sub>] scale using the experimental  $\delta(^{11}\text{B})$  value of B<sub>2</sub>H<sub>6</sub>, 16.6 ppm<sup>10</sup> Population analysis was performed using natural bond orbital (NBO)<sup>11, 12</sup> as implemented in Gaussian09.

## II. Supplementary Data

**Table S1.** Selected bond parameters for the compounds **2'**-**4'** optimized at the BP86/def2-TZVP Level.

|           | <b>2'</b> |       | <b>3'</b> |       | <b>4'</b> |       |
|-----------|-----------|-------|-----------|-------|-----------|-------|
|           | Exp.      | Cal.  | Exp.      | Cal.  | Exp.      | Cal.  |
| d(Mo-Mo)  | 2.751     | 2.748 | 2.926     | 2.947 | 2.961     | 2.997 |
| d(B1-B2)  | 1.622     | 1.625 | 1.626     | 1.658 | 1.719     | 1.739 |
| d(B2-B_2) | 1.679     | 1.681 | 1.736     | 1.718 | -         | -     |
| d(B2-B3)  | -         | -     | -         | -     | 1.736     | 1.734 |
| d(B3-W1)  | -         | -     | -         | -     | 2.339     | 2.356 |
| d(Ru-Ru)  | 2.882     | 3.06  | -         | -     | -         | -     |
| d(Ru-B)   | 2.180     | 2.24  | -         | -     | -         | -     |

**Table S2.** DFT calculated and experimental  $^{11}\text{B}$  chemical shifts  $\delta$  (ppm) and IR ( $\text{cm}^{-1}$ , uncorrected) stretching values for **2'**-**4'** at BP86/def2-TZVP.

| Compound            | <b>2'</b> |      | <b>3'</b> |         | <b>4'</b>  |                 |
|---------------------|-----------|------|-----------|---------|------------|-----------------|
| $^{11}\text{B}$ NMR | Exp.      | Cal. | Exp.      | Cal.    | Exp.       | Cal.            |
| B1                  | 91.3      | 93.3 | 15.8      | 15.1    | 75.4       | 72.5            |
| B2                  | 91.3      | 87.5 | 63.7      | 67.4    | 106.6      | 110.5           |
| B3                  | -         | -    | -         | -       | 99.2       | 93.2            |
| <b>IR-values</b>    |           |      |           |         |            |                 |
| $\text{CO}_t$       | 1799,     | 1852 | 1912.7,   | 1916.3, | 1894, 2002 | 1894.1, 1899.8, |
|                     | 1743      | 1780 | 1869.3    | 1874.7  |            | 1937.5, 1993.1  |
| $\text{CO}_{br}$    | -         | -    | -         | -       | 1836       | 1830.8          |



Cartesian coordinates (xyz) for all the optimized geometries of 2'-4' and  $[(Cp^*Mo)_2B_4H_8]$  calculated at BP86(def2-TZVP level.)

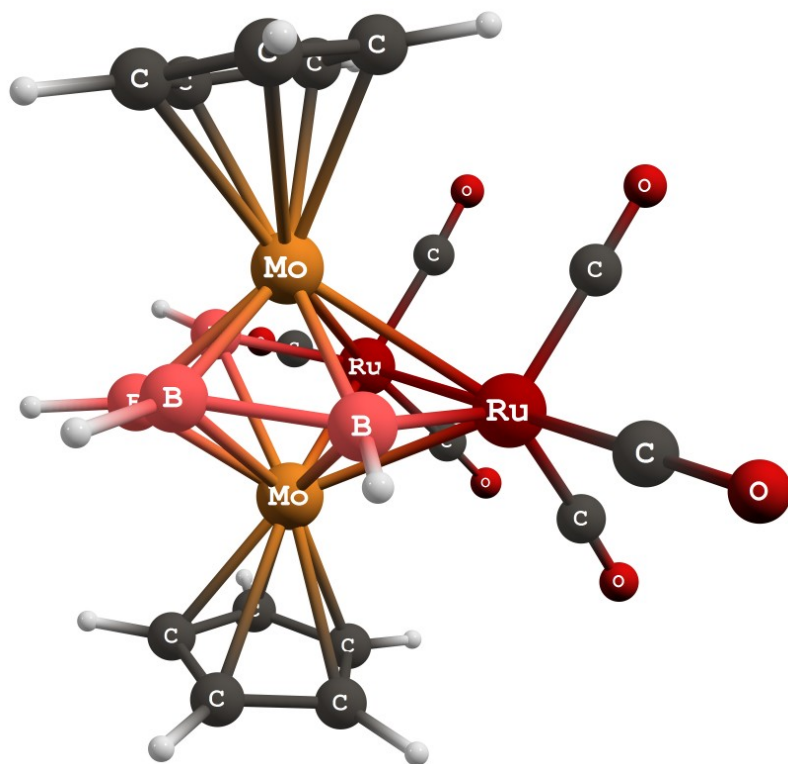

Fig. S7 Optimized geometry of 2' Complex.

Cartesian coordinates for the calculated structure of 2' (in Å).

| Center Number | Atomic Number | Atomic Type | Coordinates (Angstroms) |           |           |
|---------------|---------------|-------------|-------------------------|-----------|-----------|
|               |               |             | X                       | Y         | Z         |
| 1             | 6             | 0           | 1.710715                | -1.966580 | 1.592412  |
| 2             | 6             | 0           | -1.180834               | -1.491497 | 2.220377  |
| 3             | 6             | 0           | -0.375443               | -3.502299 | 0.500395  |
| 4             | 6             | 0           | 2.544379                | -0.781206 | -2.929109 |
| 5             | 6             | 0           | 3.012665                | -1.329480 | -1.699438 |
| 6             | 6             | 0           | 3.439381                | -0.290452 | -0.883747 |
| 7             | 6             | 0           | 3.243861                | 0.926713  | -1.588248 |
| 8             | 6             | 0           | 2.690127                | 0.621042  | -2.862235 |
| 9             | 5             | 0           | -0.647631               | -1.713168 | -1.321272 |

|    |    |   |           |           |           |
|----|----|---|-----------|-----------|-----------|
| 10 | 1  | 0 | -0.745233 | -2.729336 | -1.914038 |
| 11 | 5  | 0 | -0.968407 | -0.467622 | -2.620754 |
| 12 | 1  | 0 | -1.216725 | -0.929161 | -3.685411 |
| 13 | 8  | 0 | 2.729521  | -2.272287 | 2.009732  |
| 14 | 8  | 0 | -1.959942 | -1.458642 | 3.066990  |
| 15 | 8  | 0 | -0.575810 | -4.604643 | 0.390098  |
| 16 | 42 | 0 | 1.028512  | -0.000153 | -1.283324 |
| 17 | 44 | 0 | 0.004382  | -1.622421 | 0.709009  |
| 18 | 6  | 0 | -0.664634 | 1.550894  | 2.414846  |
| 19 | 6  | 0 | 2.122186  | 1.012440  | 2.071872  |
| 20 | 6  | 0 | 0.883800  | 3.302154  | 0.898252  |
| 21 | 6  | 0 | -3.494202 | 1.752466  | -0.953700 |
| 22 | 6  | 0 | -3.546022 | 1.108073  | 0.381393  |
| 23 | 6  | 0 | -3.784857 | -0.314277 | 0.208383  |
| 24 | 6  | 0 | -3.883442 | -0.574075 | -1.193190 |
| 25 | 6  | 0 | -3.709070 | 0.671787  | -1.902656 |
| 26 | 5  | 0 | -0.385793 | 1.956520  | -1.007105 |
| 27 | 1  | 0 | -0.497872 | 3.116310  | -1.249615 |
| 28 | 5  | 0 | -0.270931 | 1.114160  | -2.501827 |
| 29 | 1  | 0 | -0.333104 | 1.772232  | -3.495914 |
| 30 | 8  | 0 | -1.384488 | 1.754209  | 3.286768  |
| 31 | 8  | 0 | 3.056576  | 0.808810  | 2.687709  |
| 32 | 8  | 0 | 1.097082  | 4.410941  | 0.889746  |
| 33 | 42 | 0 | -1.630160 | 0.232056  | -0.806959 |
| 34 | 44 | 0 | 0.566543  | 1.384748  | 0.940384  |
| 35 | 1  | 0 | 2.154858  | -1.325910 | -3.766012 |
| 36 | 1  | 0 | 3.047079  | -2.381340 | -1.448329 |
| 37 | 1  | 0 | 3.864045  | -0.393511 | 0.092022  |
| 38 | 1  | 0 | 3.504624  | 1.922873  | -1.229082 |
| 39 | 1  | 0 | 2.458182  | 1.317800  | -3.640261 |
| 40 | 1  | 0 | -3.744993 | 0.800955  | -2.968504 |
| 41 | 1  | 0 | -3.353184 | 2.810828  | -1.171191 |
| 42 | 1  | 0 | -4.062160 | -1.552774 | -1.650066 |
| 43 | 1  | 0 | -3.878700 | -1.046396 | 0.999658  |
| 44 | 1  | 0 | -3.439659 | 1.604337  | 1.298182  |

---



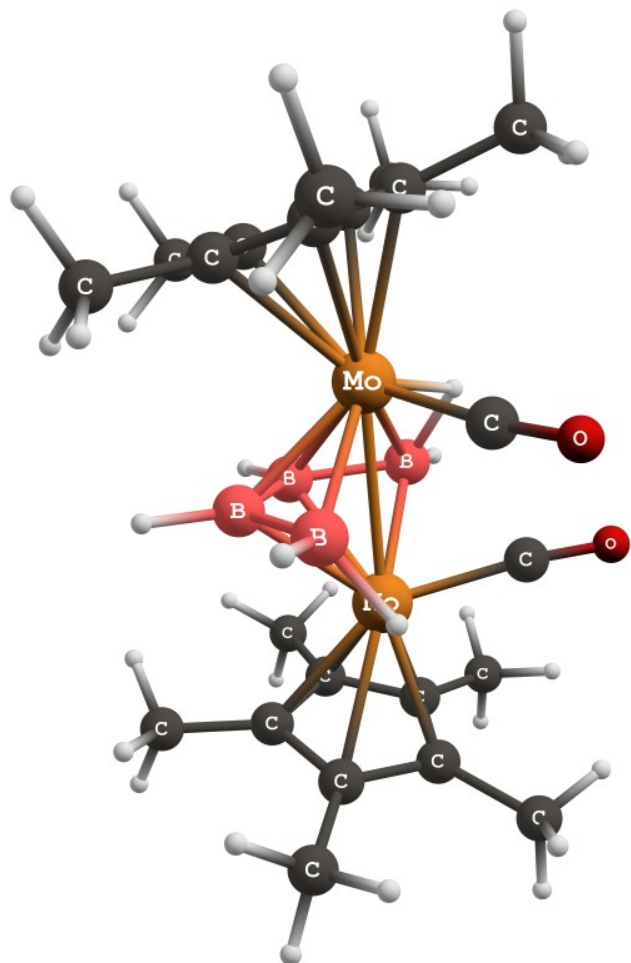

**Fig. S8** Optimized geometry of **3'**.

Cartesian coordinates for the calculated structure of **3'** (in Å).

| Center Number | Atomic Number | Atomic Type | Coordinates (Angstroms) |           |           |
|---------------|---------------|-------------|-------------------------|-----------|-----------|
|               |               |             | X                       | Y         | Z         |
| 1             | 5             | 0           | -0.072512               | 1.377660  | -0.826047 |
| 2             | 1             | 0           | -0.143566               | 2.370040  | -1.506440 |
| 3             | 5             | 0           | 0.125222                | -0.066156 | 1.756240  |
| 4             | 6             | 0           | -3.195245               | 1.219823  | -0.846938 |
| 5             | 6             | 0           | -3.163207               | 1.482471  | 0.570597  |
| 6             | 6             | 0           | -3.484045               | 0.260917  | 1.255522  |
| 7             | 6             | 0           | -3.717668               | -0.760300 | 0.269340  |
| 8             | 6             | 0           | -3.540321               | -0.159823 | -1.037186 |
| 9             | 6             | 0           | -3.834252               | -0.813752 | -2.355966 |
| 10            | 1             | 0           | -3.192910               | -0.413492 | -3.152368 |
| 11            | 1             | 0           | -4.884100               | -0.638031 | -2.646892 |

|    |    |   |           |           |           |
|----|----|---|-----------|-----------|-----------|
| 12 | 1  | 0 | -3.676838 | -1.899744 | -2.318180 |
| 13 | 6  | 0 | -3.094243 | 2.252976  | -1.927616 |
| 14 | 1  | 0 | -4.089017 | 2.687893  | -2.128433 |
| 15 | 1  | 0 | -2.720312 | 1.822574  | -2.865504 |
| 16 | 1  | 0 | -2.418540 | 3.069738  | -1.644361 |
| 17 | 6  | 0 | -2.990986 | 2.831043  | 1.202590  |
| 18 | 1  | 0 | -2.243612 | 3.434228  | 0.670418  |
| 19 | 1  | 0 | -2.667090 | 2.749643  | 2.248180  |
| 20 | 1  | 0 | -3.947150 | 3.382934  | 1.188470  |
| 21 | 6  | 0 | -3.663661 | 0.111185  | 2.738910  |
| 22 | 1  | 0 | -2.958363 | 0.739480  | 3.299168  |
| 23 | 1  | 0 | -3.516133 | -0.927521 | 3.062555  |
| 24 | 1  | 0 | -4.684415 | 0.409634  | 3.032739  |
| 25 | 6  | 0 | -4.239832 | -2.142134 | 0.540755  |
| 26 | 1  | 0 | -3.877422 | -2.532128 | 1.501390  |
| 27 | 1  | 0 | -3.938732 | -2.853703 | -0.239109 |
| 28 | 1  | 0 | -5.342725 | -2.134874 | 0.578507  |
| 29 | 6  | 0 | -1.161481 | -1.902070 | -0.771934 |
| 30 | 1  | 0 | -0.960498 | -0.851203 | 1.671717  |
| 31 | 42 | 0 | -1.471157 | -0.132968 | 0.082744  |
| 32 | 8  | 0 | -1.129511 | -2.942560 | -1.308271 |
| 33 | 5  | 0 | 0.072508  | 1.377649  | 0.826063  |
| 34 | 1  | 0 | 0.143556  | 2.370021  | 1.506468  |
| 35 | 5  | 0 | -0.125222 | -0.066136 | -1.756240 |
| 36 | 6  | 0 | 3.195247  | 1.219809  | 0.846955  |
| 37 | 6  | 0 | 3.163207  | 1.482482  | -0.570574 |
| 38 | 6  | 0 | 3.484042  | 0.260940  | -1.255522 |
| 39 | 6  | 0 | 3.717666  | -0.760295 | -0.269360 |
| 40 | 6  | 0 | 3.540323  | -0.159841 | 1.037178  |
| 41 | 6  | 0 | 3.834251  | -0.813798 | 2.355945  |
| 42 | 1  | 0 | 3.192923  | -0.413538 | 3.152358  |
| 43 | 1  | 0 | 4.884104  | -0.638103 | 2.646866  |
| 44 | 1  | 0 | 3.676814  | -1.899786 | 2.318142  |
| 45 | 6  | 0 | 3.094247  | 2.252942  | 1.927653  |
| 46 | 1  | 0 | 4.089019  | 2.687861  | 2.128471  |
| 47 | 1  | 0 | 2.720324  | 1.822521  | 2.865535  |
| 48 | 1  | 0 | 2.418537  | 3.069705  | 1.644416  |
| 49 | 6  | 0 | 2.990986  | 2.831064  | -1.202545 |
| 50 | 1  | 0 | 2.243637  | 3.434254  | -0.670342 |
| 51 | 1  | 0 | 2.667057  | 2.749682  | -2.248126 |
| 52 | 1  | 0 | 3.947158  | 3.382942  | -1.188447 |
| 53 | 6  | 0 | 3.663654  | 0.111235  | -2.738914 |
| 54 | 1  | 0 | 2.958359  | 0.739543  | -3.299159 |
| 55 | 1  | 0 | 3.516122  | -0.927465 | -3.062578 |
| 56 | 1  | 0 | 4.684409  | 0.409685  | -3.032739 |
| 57 | 6  | 0 | 4.239827  | -2.142126 | -0.540799 |
| 58 | 1  | 0 | 3.877422  | -2.532098 | -1.501444 |
| 59 | 1  | 0 | 3.938718  | -2.853710 | 0.239048  |

|    |    |   |           |           |           |
|----|----|---|-----------|-----------|-----------|
| 60 | 1  | 0 | 5.342720  | -2.134870 | -0.578542 |
| 61 | 6  | 0 | 1.161474  | -1.902074 | 0.771910  |
| 62 | 1  | 0 | 0.960500  | -0.851182 | -1.671727 |
| 63 | 42 | 0 | 1.471156  | -0.132964 | -0.082747 |
| 64 | 8  | 0 | 1.129537  | -2.942554 | 1.308270  |
| 65 | 1  | 0 | -0.402968 | -0.129992 | -2.924720 |
| 66 | 1  | 0 | 0.402968  | -0.130023 | 2.924719  |

---

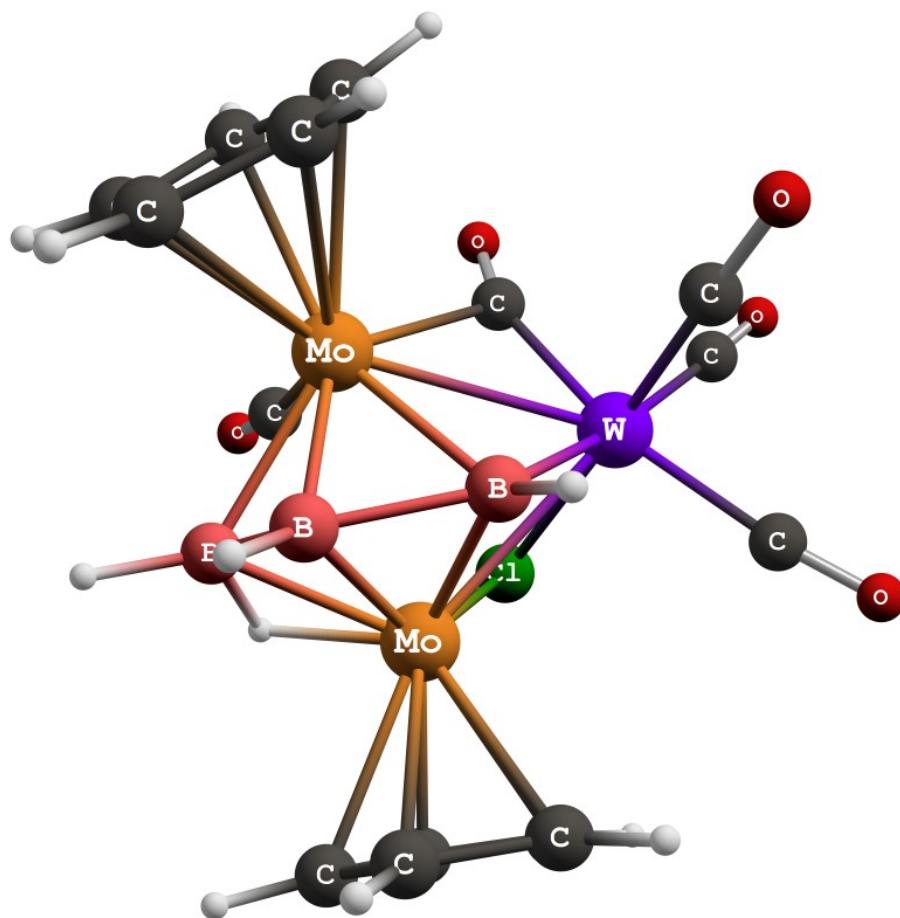

**Fig. S9.** Optimized geometry of **4'**.

Cartesian coordinates for the calculated structure of **4'** (in Å).

---

| <i>Center Number</i> | <i>Atomic Number</i> | <i>Atomic Type</i> | <i>Coordinates (Angstroms)</i> |          |           |
|----------------------|----------------------|--------------------|--------------------------------|----------|-----------|
|                      |                      |                    | <i>X</i>                       | <i>Y</i> | <i>Z</i>  |
| 1                    | 6                    | 0                  | -4.225459                      | 1.425546 | 0.743037  |
| 2                    | 1                    | 0                  | -4.238896                      | 1.967737 | -0.210222 |
| 3                    | 1                    | 0                  | -3.632200                      | 2.007267 | 1.460197  |

---

|    |   |   |           |           |           |
|----|---|---|-----------|-----------|-----------|
| 4  | 1 | 0 | -5.261739 | 1.394509  | 1.121558  |
| 5  | 6 | 0 | -3.710766 | 0.025432  | 0.584516  |
| 6  | 6 | 0 | -3.170946 | -0.785967 | 1.635150  |
| 7  | 6 | 0 | -2.986904 | -2.118127 | 1.113521  |
| 8  | 6 | 0 | -3.392825 | -2.121458 | -0.264598 |
| 9  | 6 | 0 | -3.842507 | -0.790739 | -0.594668 |
| 10 | 6 | 0 | -3.005149 | -0.382941 | 3.069251  |
| 11 | 1 | 0 | -2.157914 | -0.899470 | 3.539938  |
| 12 | 1 | 0 | -3.913471 | -0.635292 | 3.644138  |
| 13 | 1 | 0 | -2.835421 | 0.695984  | 3.172177  |
| 14 | 6 | 0 | -2.713382 | -3.343712 | 1.931061  |
| 15 | 1 | 0 | -2.155940 | -3.110443 | 2.846305  |
| 16 | 1 | 0 | -2.141556 | -4.095546 | 1.371275  |
| 17 | 1 | 0 | -3.671220 | -3.805064 | 2.228800  |
| 18 | 6 | 0 | -3.538500 | -3.339789 | -1.128236 |
| 19 | 1 | 0 | -3.477143 | -3.093091 | -2.196232 |
| 20 | 1 | 0 | -4.517271 | -3.818941 | -0.953413 |
| 21 | 1 | 0 | -2.759700 | -4.083246 | -0.912304 |
| 22 | 6 | 0 | -4.550418 | -0.408127 | -1.862133 |
| 23 | 1 | 0 | -4.186499 | -0.984794 | -2.723057 |
| 24 | 1 | 0 | -4.425387 | 0.654686  | -2.098590 |
| 25 | 1 | 0 | -5.630905 | -0.608245 | -1.761417 |
| 26 | 6 | 0 | 2.584725  | -2.859639 | 2.474851  |
| 27 | 1 | 0 | 1.989621  | -2.291937 | 3.201820  |
| 28 | 1 | 0 | 3.520165  | -3.169684 | 2.972935  |
| 29 | 1 | 0 | 2.024336  | -3.767104 | 2.217653  |
| 30 | 6 | 0 | 2.913606  | -2.041259 | 1.265465  |
| 31 | 6 | 0 | 3.139816  | -2.548061 | -0.060299 |
| 32 | 6 | 0 | 3.671275  | -1.480045 | -0.858731 |
| 33 | 6 | 0 | 3.808418  | -0.321841 | -0.011607 |
| 34 | 6 | 0 | 3.327708  | -0.662195 | 1.295641  |
| 35 | 6 | 0 | 2.980652  | -3.977511 | -0.483518 |
| 36 | 1 | 0 | 2.891752  | -4.072462 | -1.573661 |
| 37 | 1 | 0 | 2.091136  | -4.438830 | -0.033407 |
| 38 | 1 | 0 | 3.860461  | -4.563265 | -0.168146 |
| 39 | 6 | 0 | 4.156928  | -1.577123 | -2.274885 |
| 40 | 1 | 0 | 4.035216  | -0.625146 | -2.808950 |
| 41 | 1 | 0 | 3.621207  | -2.351344 | -2.840376 |
| 42 | 1 | 0 | 5.230052  | -1.833984 | -2.294426 |
| 43 | 6 | 0 | 4.490381  | 0.947911  | -0.419465 |
| 44 | 1 | 0 | 4.058810  | 1.369196  | -1.339216 |
| 45 | 1 | 0 | 5.556525  | 0.746275  | -0.616501 |
| 46 | 1 | 0 | 4.434278  | 1.713776  | 0.362060  |
| 47 | 6 | 0 | 3.444230  | 0.155889  | 2.544929  |
| 48 | 1 | 0 | 3.585450  | 1.220614  | 2.328816  |
| 49 | 1 | 0 | 4.311231  | -0.186083 | 3.136055  |
| 50 | 1 | 0 | 2.550143  | 0.057128  | 3.175142  |
| 51 | 6 | 0 | 1.802762  | 2.759844  | 0.780525  |

|    |    |   |           |           |           |
|----|----|---|-----------|-----------|-----------|
| 52 | 6  | 0 | -0.151904 | 3.663682  | -0.751502 |
| 53 | 6  | 0 | -0.796222 | 2.421021  | 1.620122  |
| 54 | 6  | 0 | -1.523257 | 1.530361  | -1.166176 |
| 55 | 6  | 0 | -1.206372 | -1.078975 | -2.060163 |
| 56 | 5  | 0 | -0.070708 | -2.431240 | -0.562694 |
| 57 | 5  | 0 | -0.075619 | -1.807190 | 1.061046  |
| 58 | 5  | 0 | 0.198036  | -0.122061 | 1.364548  |
| 59 | 8  | 0 | 2.652505  | 3.404761  | 1.248285  |
| 60 | 8  | 0 | -0.388316 | 4.714939  | -1.177551 |
| 61 | 8  | 0 | -1.353472 | 2.798442  | 2.576239  |
| 62 | 8  | 0 | -2.336307 | 1.881197  | -1.941296 |
| 63 | 8  | 0 | -1.176246 | -1.353094 | -3.197944 |
| 64 | 17 | 0 | 1.445081  | 0.812478  | -2.000108 |
| 65 | 42 | 0 | -1.520762 | -0.719797 | -0.142343 |
| 66 | 42 | 0 | 1.471809  | -0.875024 | -0.230521 |
| 67 | 74 | 0 | 0.182014  | 1.807500  | 0.012912  |
| 68 | 1  | 0 | -0.283945 | -3.594835 | -0.786502 |
| 69 | 1  | 0 | -0.125563 | -2.590621 | 1.966807  |
| 70 | 1  | 0 | 0.295835  | 0.036084  | 2.557997  |
| 71 | 1  | 0 | 0.899947  | -2.149060 | -1.389486 |

---

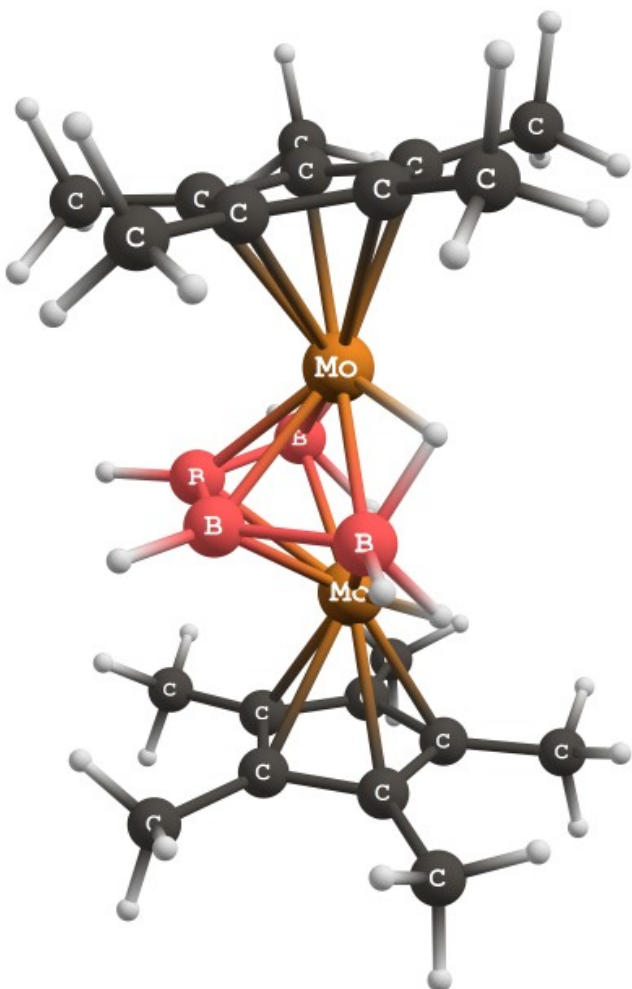

**Fig. S10.** Optimized geometry of [(Cp\*Mo)<sub>2</sub>B<sub>4</sub>H<sub>8</sub>].

Cartesian coordinates for the calculated structure of [(Cp\*Mo)<sub>2</sub>B<sub>4</sub>H<sub>8</sub>]. (in Å).

| Center Number | Atomic Number | Atomic Type | Coordinates (Angstroms) |           |           |
|---------------|---------------|-------------|-------------------------|-----------|-----------|
|               |               |             | X                       | Y         | Z         |
| 1             | 5             | 0           | -0.003385               | 0.826520  | 1.410044  |
| 2             | 1             | 0           | -0.004919               | 1.429390  | 2.454737  |
| 3             | 5             | 0           | 0.006282                | -1.848277 | -0.015916 |
| 4             | 6             | 0           | -3.281565               | 0.855315  | 0.872114  |
| 5             | 6             | 0           | -3.253558               | -0.569455 | 1.080857  |
| 6             | 6             | 0           | -3.376781               | -1.207800 | -0.201842 |
| 7             | 6             | 0           | -3.465380               | -0.177915 | -1.216909 |
| 8             | 6             | 0           | -3.424826               | 1.092646  | -0.540112 |
| 9             | 6             | 0           | -3.631301               | 2.430138  | -1.191718 |

|    |    |   |           |           |           |
|----|----|---|-----------|-----------|-----------|
| 10 | 1  | 0 | -3.142024 | 3.237883  | -0.631489 |
| 11 | 1  | 0 | -4.707942 | 2.665296  | -1.245519 |
| 12 | 1  | 0 | -3.237844 | 2.447736  | -2.217413 |
| 13 | 6  | 0 | -3.308325 | 1.892124  | 1.955090  |
| 14 | 1  | 0 | -4.327997 | 1.999067  | 2.364537  |
| 15 | 1  | 0 | -2.993295 | 2.875215  | 1.581275  |
| 16 | 1  | 0 | -2.637314 | 1.625423  | 2.782742  |
| 17 | 6  | 0 | -3.261770 | -1.248588 | 2.417570  |
| 18 | 1  | 0 | -2.629598 | -0.715349 | 3.140031  |
| 19 | 1  | 0 | -2.888405 | -2.278571 | 2.350972  |
| 20 | 1  | 0 | -4.287813 | -1.286618 | 2.823728  |
| 21 | 6  | 0 | -3.541545 | -2.682281 | -0.432531 |
| 22 | 1  | 0 | -2.965889 | -3.272675 | 0.293022  |
| 23 | 1  | 0 | -3.210129 | -2.976523 | -1.437707 |
| 24 | 1  | 0 | -4.602110 | -2.970766 | -0.334755 |
| 25 | 6  | 0 | -3.752793 | -0.398103 | -2.674641 |
| 26 | 1  | 0 | -3.291862 | -1.324465 | -3.043460 |
| 27 | 1  | 0 | -3.371082 | 0.426661  | -3.291709 |
| 28 | 1  | 0 | -4.840321 | -0.474418 | -2.857375 |
| 29 | 42 | 0 | -1.369874 | -0.004822 | -0.203699 |
| 30 | 5  | 0 | 0.003256  | -0.826748 | 1.409875  |
| 31 | 1  | 0 | 0.004639  | -1.429826 | 2.454450  |
| 32 | 5  | 0 | -0.006276 | 1.848335  | -0.015548 |
| 33 | 6  | 0 | 3.281544  | -0.855906 | 0.871787  |
| 34 | 6  | 0 | 3.253503  | 0.568729  | 1.081432  |
| 35 | 6  | 0 | 3.376799  | 1.207889  | -0.200858 |
| 36 | 6  | 0 | 3.465474  | 0.178641  | -1.216573 |
| 37 | 6  | 0 | 3.424892  | -1.092334 | -0.540588 |
| 38 | 6  | 0 | 3.631368  | -2.429408 | -1.193059 |
| 39 | 1  | 0 | 3.141995  | -3.237510 | -0.633429 |
| 40 | 1  | 0 | 4.708003  | -2.664581 | -1.246901 |
| 41 | 1  | 0 | 3.238022  | -2.446287 | -2.218809 |
| 42 | 6  | 0 | 3.308187  | -1.893426 | 1.954085  |
| 43 | 1  | 0 | 4.327814  | -2.000657 | 2.363569  |
| 44 | 1  | 0 | 2.993181  | -2.876260 | 1.579577  |
| 45 | 1  | 0 | 2.637086  | -1.627258 | 2.781840  |
| 46 | 6  | 0 | 3.261630  | 1.247041  | 2.418564  |
| 47 | 1  | 0 | 2.629536  | 0.713276  | 3.140706  |
| 48 | 1  | 0 | 2.888117  | 2.277010  | 2.352588  |
| 49 | 1  | 0 | 4.287670  | 1.284967  | 2.824740  |
| 50 | 6  | 0 | 3.541543  | 2.682520  | -0.430599 |
| 51 | 1  | 0 | 2.965579  | 3.272440  | 0.295096  |
| 52 | 1  | 0 | 3.210464  | 2.977333  | -1.435718 |
| 53 | 1  | 0 | 4.602050  | 2.971034  | -0.332278 |
| 54 | 6  | 0 | 3.752920  | 0.399738  | -2.674159 |
| 55 | 1  | 0 | 3.291928  | 1.326284  | -3.042436 |
| 56 | 1  | 0 | 3.371295  | -0.424693 | -3.291726 |
| 57 | 1  | 0 | 4.840448  | 0.476247  | -2.856809 |

|    |    |   |           |           |           |
|----|----|---|-----------|-----------|-----------|
| 58 | 1  | 0 | 1.014926  | 1.668787  | -0.824765 |
| 59 | 42 | 0 | 1.369899  | 0.004921  | -0.203567 |
| 60 | 1  | 0 | -1.014816 | -1.668538 | -0.825235 |
| 61 | 1  | 0 | -0.013035 | 3.050273  | 0.098339  |
| 62 | 1  | 0 | 0.013010  | -3.050240 | 0.097709  |
| 63 | 1  | 0 | 1.014822  | -1.652970 | -0.838461 |
| 64 | 1  | 0 | -1.014732 | 1.653192  | -0.838240 |

---

### References:

- 1 a) R. S. Dhyal, S. Sahoo and S. Ghosh, *J. Organomet. Chem.*, 2008, **694**, 237; b) M. L. H Green, J. D. Hubert and P. Mountford, *J. Chem. Soc. Dalton. Trans.*, 1990, 3793; c) M. Kaushika, A. Singh and M. Kumar, *Eur. J. Chem.*, 2012, **3**, 367.
- 2 G. E. Ryschkewitsch and K. C. Nainan, *Inorg. Synth.*, 1974, **15**, 113.
- 3 a) SHELXS-97, G. M. Sheldrick, University of Göttingen (Germany), 1997; b) SHELXL-97, G. M. Sheldrick, University of Göttingen, (Germany), 1997.
- 4 Gaussian 09, Revision C.01, M. J. Frisch, G. W. Trucks, H. B. Schlegel, G. E. Scuseria, M. A. Robb, J. R. Cheeseman, G. Scalmani, V. Barone, B. Mennucci, G. A. Petersson, H. Nakatsuji, M. Caricato, X. Li, H. P. Hratchian, A. F. Izmaylov, J. Bloino, G. Zheng, J. L. Sonnenberg, M. Hada, M. Ehara, K. Toyota, R. Fukuda, J. Hasegawa, M. Ishida, T. Nakajima, Y. Honda, O. Kitao, H. Nakai, T. Vreven, J. A. Montgomery, Jr., J. E. Peralta, F. Ogliaro, M. Bearpark, J. J. Heyd, E. Brothers, K. N. Kudin, V. N. Staroverov, R. Kobayashi, J. Normand, K. Raghavachari, A. Rendell, J. C. Burant, S. S. Iyengar, J. Tomasi, M. Cossi, N. Rega, J. M. Millam, M. Klene, J. E. Knox, J. B. Cross, V. Bakken, C. Adamo, J. Jaramillo, R. Gomperts, R. E. Stratmann, O. Yazyev, A. J. Austin, R. Cammi, C. Pomelli, J. W. Ochterski, R. L. Martin, K. Morokuma, V. G. Zakrzewski, G. A. Voth, P. Salvador, J. J. Dannenberg, S. Dapprich, A. D. Daniels, Ö. Farkas, J. B. Foresman, J. V. Ortiz, J. Cioslowski, and D. J. Fox, Gaussian, Inc., Wallingford CT, 2009.
- 5 a) H. L. Schmider and A. D. Becke, *J. Chem. Phys.*, 1998, **108**, 9624; b) J. P. Perdew, *Phys. Rev. B* 1986, **33**, 8822.
- 6 F. Weigend and R. Ahlrichs, *Phys. Chem. Chem. Phys.*, 2005, **7**, 3297.
- 7 D. Andrae, U. Häußermann, M. Dolg, H. Stoll and H. Preuss, *Theor. Chim. Acta.*, 1990, **77**, 123.



- 8 a) A. D. Becke, *Phys. Rev. A* 1988, **38**, 3098; b) C. Lee, W. Yang and R. G. Parr, *Phys. Rev. B* 1988, **37**, 785; c) A. D. Becke, *J. Chem. Phys.*, 1993, **98**, 5648.
- 9 a) F. London, *J. Phys. Radium.*, 1937, **8**, 397; b) R. McWeeny, *Phys. Rev.*, 1962, **126**, 1028; c) R. Ditchfield, *Mol. Phys.*, 1974, **27**, 789; d) J. L. Dodds, R. McWeeny and A. Sadlej, *J. Mol. Phys.*, 1977, **34**, 1779; e) K. Wolinski, J. F. Hinton and P. Pulay, *J. Am. Chem. Soc.*, 1990, **112**, 8251.
- 10 T. P. Onak, H. L. Landesman, R. E. Williams and I. Shapiro, *J. Phys. Chem.*, 1959, **63**, 1533.
- 11 F. Weinhold and R. Landis, *Valency and bonding: A natural bond orbital donor-acceptor perspective*; Cambridge University Press: Cambridge; U.K, 2005.
- 12 A. E. Reed, L. A. Curtiss and F. Weinhold, *Chem. Rev.*, 1988, **88**, 899.
